1 **Title: Many bat species are not potential hosts of SARS-CoV and SARS-CoV-**  
2 **2: Evidence from ACE2 receptor usage**

3 **Authors:** Huan Yan<sup>1#</sup>, Hengwu Jiao<sup>2#</sup>, Qianyun Liu<sup>1</sup>, Zhen Zhang<sup>1</sup>, Xin Wang<sup>1</sup>, Ming Guo<sup>1</sup>,  
4 Bing-Jun Wang<sup>2</sup>, Ke Lan<sup>1,3\*</sup>, Yu Chen<sup>1\*</sup>, Huabin Zhao<sup>2\*</sup>

5 **Affiliations:**

6 <sup>1</sup>State Key Laboratory of Virology, Modern Virology Research Center, College of Life Sciences,  
7 Wuhan University, Wuhan, 430072, China

8 <sup>2</sup>Department of Ecology, Tibetan Centre for Ecology and Conservation at WHU-TU, Hubei Key  
9 Laboratory of Cell Homeostasis, College of Life Sciences, Wuhan University, Wuhan 430072,  
10 China

11 <sup>3</sup>Frontier Science Center for Immunology and Metabolism, Wuhan University, Wuhan, 430072,  
12 China

13  
14 \*Correspondence to: Huabin Zhao, Email: [huabinzhao@whu.edu.cn](mailto:huabinzhao@whu.edu.cn); Yu Chen, Email:  
15 [chenyu@whu.edu.cn](mailto:chenyu@whu.edu.cn); Ke Lan, Email: [kland@whu.edu.cn](mailto:kland@whu.edu.cn)

16 #These authors contributed equally to this work.

17  
18 **Abstract:** Bats are the suggested natural hosts for severe acute respiratory syndrome coronavirus  
19 (SARS-CoV) and SARS-CoV-2, the latter of which caused the coronavirus disease 2019  
20 (COVID-19) pandemic. The interaction of viral Spike proteins with their host receptor  
21 angiotensin-converting enzyme 2 (ACE2) is a critical determinant of potential hosts and cross-  
22 species transmission. Here we use virus-host receptor binding and infection assays to show that  
23 ACE2 orthologs from 24, 21, and 16 of 46 phylogenetically diverse bat species – including those  
24 in close and distant contact with humans – do not support entry of SARS-CoV, SARS-CoV-2,  
25 and both of these coronaviruses, respectively. Furthermore, we used genetic and functional  
26 analyses to identify genetic changes in bat ACE2 receptors associated with viral entry  
27 restrictions. Our study demonstrates that many – if not most – bat species are not potential hosts  
28 of SARS-CoV and SARS-CoV-2, and provides important insights into pandemic control and  
29 wildlife conservation.

38

## **Introduction**

39

The unprecedented pandemic of COVID-19, caused by the novel coronavirus SARS-CoV-2, has led to major threats to public health and economic development. It is therefore critically important to identify natural or intermediate hosts of SARS-CoV-2 to prevent further spread of COVID-19 and future emergence of similar diseases. Inferred from sequence similarity of human and bat virus genomes, Zheng-Li Shi and colleagues suggested that horseshoe bats (*Rhinolophus* spp.) might be natural hosts of SARS-CoV and SARS-CoV-2 (1-3). These suggestions have resulted in misguided fears and unwarranted attacks on many bats – including species other than *Rhinolophus* – thereby seriously impacting efforts towards bat conservation (4). Given the remarkable diversity of bats, which includes more than 1400 species across the globe (5), assessing the possibility that diverse bat species act as potential hosts of SARS-CoV and SARS-CoV-2 is urgent and crucial for both controlling outbreaks and protecting populations of wildlife.

51

ACE2 is the host cell receptor of SARS-CoV and SARS-CoV-2, and plays a vital role in mediating viral entry to cause infection (1, 6). The interaction of a virus with its host receptor has been repeatedly demonstrated to serve as a primary determinant of host range (7). Here we test ACE2 orthologs from 46 bat species across the phylogeny, including species occurring in urban and in rural areas, for their ability to support the entry of SARS-CoV and SARS-CoV-2. Hence, this study assesses whether diverse bat species are potential hosts of SARS-CoV or SARS-CoV-2. Moreover, by determining the correlation between proximity to humans and probability of being natural hosts of the two viruses, these results provide important insights into pandemic control and wildlife conservation.

60

61

## **Results**

62

### **Evolution of ACE2 in bats inhabiting urban or rural areas**

63

We collected ACE2 orthologs from 46 bat species across the phylogeny (**Figure 1 and Table S1**). These species contained 28 species that roost or forage in urban areas in close proximity to humans, and 18 species more restricted to rural areas and hence likely to have minimal contact with humans (**Table S2**). In total, the examined species represent 11 bat families that contain 1345 species, accounting for 96% of all bat species (**Table S3**). After aligning the protein sequences of bat ACE2 orthologs, we examined 25 critical residues involved in the binding of the surface spike glycoprotein (S protein) of SARS-CoV-2 (**Figure S1**) (8). Genetic variations were observed in nearly all these 25 sites, which may have led to different abilities to support entry of SARS-CoV and SARS-CoV-2 (8). Furthermore, we detected at least 22 amino acid sites that are putatively under positive selection (**Table S4**), indicative of heterogeneous selection pressure across sites. Notably, four of these positively selected sites are located in the binding region of ACE2 to the SARS-CoV-2 S protein (**Table S4**).

75

76

### **Interaction between bat ACE2 orthologs and SARS-CoV or SARS-CoV-2 receptor binding domain (RBD)**

77

78

Efficient binding between the S protein and the ACE2 receptor is important for SARS-CoV and SARS-CoV-2 entry. This binding is mainly mediated by the interaction between the critical residues on the RBD and ACE2. To characterize the receptor function of ACE2 orthologs in a

79

80

81 range of diverse bat species, we generated a stable cell library consisting of cell lines expressing  
82 the respective 46 bat ACE2 orthologs through lentiviral transduction of 293T cells lacking ACE2  
83 expression (9). All bat ACE2 orthologs were exogenously expressed at a comparable level after  
84 puromycin selection, as indicated by Western-blot and immunofluorescence assays detecting the  
85 C-terminal 3×Flag tag (**Figure 2A-B**).

86 To analyze the interaction, we produced recombinant SARS or SARS-CoV-2 RBD human  
87 IgG Fc fusion proteins (RBD-hFc), previously reported to be sufficient to bind human ACE2  
88 efficiently (10, 11). The protein binding efficiency was tested on the bat ACE2 cell library  
89 through immunofluorescence or flow cytometry targeting the human Fc. As expected, binding  
90 was almost undetectable on mock 293T cells, but a strong binding signal was detected on the  
91 293T cells expressing human ACE2 (**Figure 2C-D**). Consistent with previous reports (12, 13),  
92 SARS-CoV-2 RBD showed higher binding to hACE2 than SARS-CoV, which can also be  
93 observed on many bat ACE2 orthologs (**Figure 2C-D**). Previous reports have shown that only a  
94 small fraction of ACE2 orthologs from tested mammalian species could not bind with SARS-  
95 CoV-2 S protein [n=6 of 49 species (7); n=5 of 17 species (14)]. However, our study revealed  
96 that many bat species (n=32 and n=28 of 46 species) do not support efficient binding with  
97 SARS-CoV-RBD and SARS-CoV-2-RBD, respectively (**Figure 2C-D**). The overall profiles of  
98 bat ACE2 to bind to SARS-CoV and SARS-CoV-2 RBD are generally comparable; a few  
99 showed contrasting modes of binding preferences (**Figure 2C-D**). For instance, Bat22 can bind  
100 to SARS-CoV but not SARS-CoV-2, whereas Bat14, 21, 40 can bind to SARS-CoV-2 but not  
101 SARS-CoV (**Figure 2C-D**). Flow cytometry analysis showed consistent results (**Figure S2**).

102 Overall, the RBD-hFc binding assays demonstrated that bat ACE2 orthologs showed  
103 different affinity and selectivity levels to SARS-CoV and SARS-CoV-2, indicating that ACE2  
104 receptors of many bat species may not support efficient SARS-CoV and SARS-CoV-2 infection.

105

### 106 **Receptor function of bat ACE2 orthologs to support the entry of SARS-CoV and SARS-** 107 **CoV-2 using pseudotyped and live viruses**

108 To further evaluate the receptor function of different bat ACE2 orthologs, we employed a  
109 Vesicular Stomatitis Virus (VSV)-based Rhabdoviral pseudotyping system for mimicking the  
110 coronavirus spike-protein mediated single-round entry (14). SARS-CoV and SARS-CoV-2  
111 pseudotypes were generated by assembling the coronavirus spike proteins and the replication-  
112 deficient VSV with the VSV glycoprotein (VSVG) gene replaced with a fluorescence protein  
113 (VSV-dG-GFP) or a Firefly Luciferase (VSV-dG-Luc) reporter (14). Both viruses showed  
114 minimal background infection on 293T cells, but efficient infection on 293T-hACE2 cells  
115 (**Figure S3**). The susceptibility of the 293T cells expressing bat ACE2 orthologs was then  
116 examined with SARS-CoV and SARS-CoV-2 pseudotypes. The results showed that bat ACE2  
117 orthologs have varying abilities to support coronavirus entry, and different preferences for  
118 SARS-CoV and SARS-CoV-2. (**Figure 3A-B, Table S5**). Pseudotypes with GFP reporter  
119 showed similar results (**Figure S4**). Notably, we found that 24, 21, and 16 of the 46 bat species  
120 showed almost no entry for SARS-CoV, SARS-CoV-2, and both viruses, respectively (**Figures 1**  
121 **and 3A-B, Table S5**), suggesting that these species are not likely to be potential hosts of either  
122 or both of these coronaviruses. The bat species showing no viral entry include those that occur in  
123 urban areas as well as those more restricted to rural areas (**Figure 1, Table S1**), suggesting that  
124 there is no correlation between proximity to humans and probability of being natural hosts of

125 SARS-CoV or SARS-CoV-2. Although horseshoe bats were suggested to be potential natural  
126 hosts of SARS-CoV and SARS-CoV-2 (1-3), only one of the three examined species  
127 (*Rhinolophus sinicus*) supported SARS-CoV entry; this species was suggested to be the potential  
128 host of SARS-CoV (3, 15). None of these tested horseshoe bats showed entry for SARS-CoV-2  
129 (**Figures 1 and 3**). These results unambiguously indicate that ACE2 receptor usage is species-  
130 dependent.

131 The SARS-CoV-2 S protein used here for pseudotyping contains a D614G mutation, which  
132 is currently a dominant variation (16). The D614G mutation remarkably improved the *in vitro*  
133 infectivity of SARS-CoV-2, but may not significantly affect the receptor interaction since it is  
134 not in the RBD (17). Indeed, we identified a very similar susceptibility profile using an original  
135 strain without D614G (**Figure S5**). We further demonstrated that the pseudotyped entry assay  
136 mimics the entry of live viruses through a SARS-CoV-2 infection assay (**Figure 3C**). As  
137 expected, the profile of SARS-CoV-2 N protein expression is highly consistent with the results  
138 from the VSV-dG-based pseudotyped virus entry assay (**Figure 3C**). However, the live virus  
139 infection resulted in the phenotype of plaque formation, while the pseudotypes showed evenly  
140 distributed single-round infection (**Figure S4**).

141 When comparing the RBD-hFc binding and pseudotype entry profiles, we found that  
142 binding and susceptibility are generally consistent, with a few exceptions. For instance, some  
143 species (Bat12, 13, 14) were able to bind to SARS-CoV-2 RBD-hFc efficiently, but cannot  
144 support infection of the same virus, indicating that high binding affinity does not guarantee  
145 efficient viral entry (**Figures 2 and 3**). In contrast, some species (Bat3-8) were defective or less  
146 efficient in SARS-CoV RBD-hFc binding, but supported the entry of the same virus to some  
147 degree (**Figures 2 and 3**). We hypothesize that such minimal binding may be sufficient for viral  
148 entry mediated by those ACE2 orthologs; alternatively, additional residues outside the traditional  
149 RBD region might be required for efficient interaction. These hypotheses should be tested in the  
150 future.

151 Together, our results demonstrated that SARS-CoV and SARS-CoV-2 can selectively use  
152 some bat ACE2 as functional receptors for viral entry, but many – if not most – bat ACE2 are not  
153 favored by one or both viruses. The functional defects in ACE2 coronavirus receptor in our  
154 functional assays provide strong evidence that rejects the suggestion that many/most bat species  
155 are potential natural hosts of SARS-CoV and/or SARS-CoV-2.

156

### 157 **Evaluation of critical genetic changes in bat ACE2 orthologs affecting the viral binding and** 158 **entry efficiency or specificity**

159 We comprehensively analyzed the relationship between critical RBD binding sites in bat  
160 ACE2 sequences and their ability to support SARS-CoV and SARS-CoV-2 RBD binding and  
161 viral entry. Several critical residues were identified that may play critical roles in the  
162 determination of species specificity (**Figure S1**). According to the sequence alignment, two  
163 species pairs (Bat33-34 and Bat38-40) were selected to demonstrate the role of critical residues  
164 in RBD binding and viral entry, because they are phylogenetically close but show contrasting  
165 phenotypes for supporting RBD binding and viral entry. Specifically, Bat34 and 38 do not  
166 support SARS-CoV and SARS-CoV-2 RBD binding and infection, while Bat33 supports  
167 efficient binding and infection of both viruses, and Bat40 supports infection of both viruses and  
168 to a lesser degree, SARS-RBD binding (**Figures 2 and 3**). We compared their protein sequences

169 and highlighted the residues that may affect RBD interaction. For example, substitutions I27K,  
170 N31G, and K42E were observed when comparing Bat33 and 34, while Q24L, E30K, K35Q, and  
171 G354N were present between Bat38 and 40 (**Figure 4A**). We hypothesized that the discrepancy  
172 in binding and infection phenotype is determined by their differences in critical residues for RBD  
173 interaction. To test this hypothesis, we designed a residue swap mutagenesis assay to investigate  
174 the role of critical residues on RBD binding and virus entry (**Figure 4A**). We generated four  
175 swap mutations and corresponding 293T stable cell lines to test whether these substitutions can  
176 achieve the gain-of-function and loss-of-function. All bat ACE2 orthologs and related mutants  
177 were expressed at a comparable level after lentiviral transduction, as indicated by the  
178 immunofluorescence of the carboxyl-terminal (C-terminal) 3×Flag tag (**Figure 4B**).  
179 Recombinant SARS-CoV and SARS-CoV-2 RBD-hFc proteins were applied to the cells  
180 expressing different ACE2, and the binding efficiency was evaluated by fluorescence (**Figure**  
181 **4C**) and flow cytometry assays (**Figure 4D**). As expected, the swap of critical residues on the  
182 selected four bat ACE2 changed their receptor function to the opposite, except for Bat38m  
183 (Bat38 mutant) that remained unable to bind SARS-CoV RBD-hFc (**Figure 4D-4E**). The GFP  
184 (**Figure 4E**) and Luciferase levels (**Figure 4F**) from the pseudotyped virus entry assay, as well  
185 as the N protein staining from the live SARS-CoV-2 infection assay (**Figure 4G**) further  
186 confirmed our hypothesis at the viral entry level. Structure modeling of bat ACE2 orthologs  
187 showed that these residues appeared to occur in the interface between S protein and ACE2  
188 receptor (**Figure 4H-4I**), and amino acid changes in these sites could potentially lead to different  
189 abilities to support RBD binding and viral entry, confirming our results of virus-host receptor  
190 binding and infection assays.

191

## 192 **Discussion**

193 Our study provides genetic and functional evidence from bat ACE2 receptor usage to reject  
194 the suggestion that many, if not most, bat species are potential hosts of SARS-CoV and SARS-  
195 CoV-2. Our sampling covers representative species from 11 bat families, accounting for 96% of  
196 all extant bat species, hence providing a broad picture. Moreover, our study included 28 species  
197 inhabiting urban areas and 18 species that are not common in cities or do not roost in buildings.  
198 Our functional assays demonstrated that there is no correlation between proximity to humans and  
199 probability of being natural hosts of SARS-CoV or SARS-CoV-2. Therefore, there is no need to  
200 fear the many bat species occurring in cities that are not potential hosts of SARS-CoV and  
201 SARS-CoV-2. Species such as horseshoe bats, which are suggested to be potential natural hosts  
202 of the two viruses, should also not be feared, as they are less likely to be found in cities.

203 Our results are only partially consistent with a recently published prediction based on  
204 sequence similarity, which estimated a binding score between ACE2 and the SARS-CoV-2 S  
205 protein for each vertebrate species (8). The predicted binding scores for all 37 bat species fell  
206 into low (n=8) and very low (n=29) categories (8), suggesting that all examined bat species are at  
207 low risk for SARS-CoV-2 infection. Our study included 36 of the 37 previously examined bat  
208 species (**Figure 1 and Table S1**); 21 of these appeared to support SARS-CoV-2 entry by their  
209 ACE2 receptors (**Figures 1 and 3**), strongly suggesting that these bats are at high risk for SARS-  
210 CoV-2 infection. These disparities between in silico analyses and functional experiments  
211 strongly indicate the importance of experimental data for confirmation of in silico analyses, as  
212 our understanding of ACE2 sequences and structures is incomplete thus far. Indeed, our genetic  
213 and functional evidence revealed critical residues of bat ACE2 that are involved in supporting

214 SARS-CoV-2 entry (**Figure 4**). However, these residues are not the genetic determinant of New  
215 World monkey ACE2 orthologs mediating SARS-CoV-2 entry (7), and many bat ACE2  
216 orthologs carrying residues that were considered unfavorable in the same study (H41 and E42) (7)  
217 were fully functional in our study (**Figure 4**), further confirming the complexity of ACE2  
218 functionality.

219 We found that closely related species can show strikingly different ACE2 receptor usage.  
220 For example, *Rhinolophus sinicus* can support SARS-CoV entry, whereas its congeneric  
221 relatives *R. ferrumequinum* and *R. pearsonii* cannot (**Figures 1 and 3**), despite the fact that some  
222 polymorphic sites of ACE2 may have occurred in *R. sinicus* populations (18). These findings  
223 clearly show that ACE2 receptor usage is species-dependent. Accordingly, although some bats  
224 might be potential hosts of SARS-CoV and SARS-CoV-2 (1-3), one cannot assume that all bat  
225 species or individuals can carry these viruses. On a positive note, even if some bat species are  
226 potential hosts of certain viruses, they do not appear to have overt clinical signs of infection,  
227 suggesting that these bats may serve as animal models to develop treatments for humans.  
228 Although certain bat species are frequently observed to carry coronaviruses closely related to  
229 human viruses in terms of sequence similarity (19), there is no solid and direct evidence showing  
230 the initial spillover from bats to humans and other animals. Nevertheless, humans infected with  
231 coronavirus should maintain distance from bats that can use ACE2 as a viral receptor, because  
232 many bat species are endangered and may be susceptible to human coronaviruses (20), as  
233 suggested for many other mammals (8, 21). Indeed, the International Union for Conservation of  
234 Nature (IUCN) has assessed that over one third of bat species are threatened or data deficient,  
235 and over half of all bat species have unknown or decreasing population trends (22). Thus, bats  
236 are in need of protection more than ever.

237 Our study supports the calls that public education on bat biology will reduce the threat to  
238 bats (4, 22). In fact, all bats are potentially safe as long as they are treated with care and respect.  
239 We should work collaboratively to combat the pandemic and identify which species are potential  
240 hosts, and not fear those species that are not hosts of the virus. Instead, we must respect and care  
241 for those species that are potential hosts, and learn about the impact of human activities on their  
242 natural habitats, which may lead to zoonotic spillover events.

243

## 244 **References and Notes**

- 245 1. P. Zhou, X. L. Yang, X. G. Wang, B. Hu, L. Zhang, W. Zhang, H. R. Si, Y. Zhu, B. Li, C.  
246 L. Huang, H. D. Chen, J. Chen, Y. Luo, H. Guo, R. D. Jiang, M. Q. Liu, Y. Chen, X. R.  
247 Shen, X. Wang, X. S. Zheng, K. Zhao, Q. J. Chen, F. Deng, L. L. Liu, B. Yan, F. X. Zhan,  
248 Y. Y. Wang, G. F. Xiao, Z. L. Shi, A pneumonia outbreak associated with a new  
249 coronavirus of probable bat origin. *Nature* **579**, 270-273 (2020).
- 250 2. W. Li, Z. Shi, M. Yu, W. Ren, C. Smith, J. H. Epstein, H. Wang, G. Crameri, Z. Hu, H.  
251 Zhang, J. Zhang, J. McEachern, H. Field, P. Daszak, B. T. Eaton, S. Zhang, L. F. Wang,  
252 Bats are natural reservoirs of SARS-like coronaviruses. *Science* **310**, 676-679 (2005).
- 253 3. B. Hu, L. P. Zeng, X. L. Yang, X. Y. Ge, W. Zhang, B. Li, J. Z. Xie, X. R. Shen, Y. Z.  
254 Zhang, N. Wang, D. S. Luo, X. S. Zheng, M. N. Wang, P. Daszak, L. F. Wang, J. Cui, Z.  
255 L. Shi, Discovery of a rich gene pool of bat SARS-related coronaviruses provides new  
256 insights into the origin of SARS coronavirus. *PLoS Pathog* **13**, e1006698 (2017).
- 257 4. H. Zhao, COVID-19 drives new threat to bats in China. *Science* **367**, 1436 (2020).

- 258 5. D. E. Wilson, R. A. Mittermeier, *Handbook of the Mammals of the World. Vol. 9: Bats.*  
259 (Lynx Edicions, Barcelona, 2019).
- 260 6. W. Li, M. J. Moore, N. Vasilieva, J. Sui, S. K. Wong, M. A. Berne, M. Somasundaran, J.  
261 L. Sullivan, K. Luzuriaga, T. C. Greenough, H. Choe, M. Farzan, Angiotensin-converting  
262 enzyme 2 is a functional receptor for the SARS coronavirus. *Nature* **426**, 450-454 (2003).
- 263 7. Y. Liu, G. Hu, Y. Wang, X. Zhao, F. Ji, W. Ren, M. Gong, X. Ju, C. Li, J. Hong, Y. Zhu,  
264 X. Cai, J. Wu, X. Lan, Y. Xie, X. Wang, Z. Yuan, R. Zhang, Q. Ding, Functional and  
265 genetic analysis of viral receptor ACE2 orthologs reveals broad potential host range of  
266 SARS-CoV-2. *bioRxiv*, doi: <https://doi.org/10.1101/2020.1104.1122.046565> (2020).
- 267 8. J. Damas, G. M. Hughes, K. C. Keough, C. A. Painter, N. S. Persky, M. Corbo, M. Hiller,  
268 K. P. Koepfli, A. R. Pfenning, H. Zhao, D. P. Genereux, R. Swofford, K. S. Pollard, O. A.  
269 Ryder, M. T. Nweeia, K. Lindblad-Toh, E. C. Teeling, E. K. Karlsson, H. A. Lewin,  
270 Broad host range of SARS-CoV-2 predicted by comparative and structural analysis of  
271 ACE2 in vertebrates. *Proc Natl Acad Sci U S A*, <https://doi.org/10.1073/pnas.2010146117>  
272 (2020).
- 273 9. E. C. Mossel, C. Huang, K. Narayanan, S. Makino, R. B. Tesh, C. J. Peters, Exogenous  
274 ACE2 expression allows refractory cell lines to support severe acute respiratory  
275 syndrome coronavirus replication. *J. Virol.* **79**, 3846-3850 (2005).
- 276 10. S. K. Wong, W. Li, M. J. Moore, H. Choe, M. Farzan, A 193-amino acid fragment of the  
277 SARS coronavirus S protein efficiently binds angiotensin-converting enzyme 2. *J Biol*  
278 *Chem* **279**, 3197-3201 (2004).
- 279 11. W. Tai, L. He, X. Zhang, J. Pu, D. Voronin, S. Jiang, Y. Zhou, L. Du, Characterization of  
280 the receptor-binding domain (RBD) of 2019 novel coronavirus: implication for  
281 development of RBD protein as a viral attachment inhibitor and vaccine. *Cell Mol*  
282 *Immunol* **17**, 613-620 (2020).
- 283 12. D. Wrapp, N. Wang, K. S. Corbett, J. A. Goldsmith, C. L. Hsieh, O. Abiona, B. S.  
284 Graham, J. S. McLellan, Cryo-EM structure of the 2019-nCoV spike in the prefusion  
285 conformation. *Science* **367**, 1260-1263 (2020).
- 286 13. J. Shang, G. Ye, K. Shi, Y. Wan, C. Luo, H. Aihara, Q. Geng, A. Auerbach, F. Li,  
287 Structural basis of receptor recognition by SARS-CoV-2. *Nature* **581**, 221-224 (2020).
- 288 14. J. Nie, Q. Li, J. Wu, C. Zhao, H. Hao, H. Liu, L. Zhang, L. Nie, H. Qin, M. Wang, Q. Lu,  
289 X. Li, Q. Sun, J. Liu, C. Fan, W. Huang, M. Xu, Y. Wang, Establishment and validation  
290 of a pseudovirus neutralization assay for SARS-CoV-2. *Emerg Microbes Infect* **9**, 680-  
291 686 (2020).
- 292 15. S. K. Lau, P. C. Woo, K. S. Li, Y. Huang, H. W. Tsoi, B. H. Wong, S. S. Wong, S. Y.  
293 Leung, K. H. Chan, K. Y. Yuen, Severe acute respiratory syndrome coronavirus-like  
294 virus in Chinese horseshoe bats. *Proc Natl Acad Sci U S A* **102**, 14040-14045 (2005).
- 295 16. B. Korber, W. M. Fischer, S. Gnanakaran, H. Yoon, J. Theiler, W. Abfalterer, N.  
296 Hengartner, E. E. Giorgi, T. Bhattacharya, B. Foley, K. M. Hastie, M. D. Parker, D. G.  
297 Partridge, C. M. Evans, T. M. Freeman, T. I. de Silva, C.-G. G. Sheffield, C. McDanal, L.  
298 G. Perez, H. Tang, A. Moon-Walker, S. P. Whelan, C. C. LaBranche, E. O. Saphire, D. C.  
299 Montefiori, Tracking changes in SARS-CoV-2 spike: Evidence that D614G increases  
300 infectivity of the COVID-19 virus. *Cell* **182**, 812-827 e819 (2020).
- 301 17. J. Hu, C. L. He, Q. Z. Gao, G. J. Zhang, X. X. Cao, Q. X. Long, H. J. Deng, L. Y. Huang,  
302 J. Chen, K. Wang, N. Tang, A. L. Huang, The D614G mutation of SARS-CoV-2 spike

- 303 protein enhances viral infectivity and decreases neutralization sensitivity to individual  
304 convalescent sera. *bioRxiv*, doi: <https://doi.org/10.1101/2020.1106.1120.161323> (2020).
- 305 18. H. Guo, B. J. Hu, X. L. Yang, L. P. Zeng, B. Li, S. Ouyang, Z. L. Shi, Evolutionary arms  
306 race between virus and host drives genetic diversity in bat SARS related coronavirus  
307 spike genes. *J. Virol.*, <https://doi.org/10.1128/JVI.00902-00920> (2020).
- 308 19. A. Banerjee, K. Kulcsar, V. Misra, M. Frieman, K. Mossman, Bats and Coronaviruses.  
309 *Viruses* **11**, 41 (2019).
- 310 20. K. J. Olival, P. M. Cryan, B. R. Amman, R. S. Baric, D. S. Blehert, C. E. Brook, C. H.  
311 Calisher, K. T. Castle, J. T. H. Coleman, P. Daszak, J. H. Epstein, H. Field, W. F. Frick,  
312 A. T. Gilbert, D. T. S. Hayman, H. S. Ip, W. B. Karesh, C. K. Johnson, R. C. Kading, T.  
313 Kingston, J. M. Lorch, I. H. Mendenhall, A. J. Peel, K. L. Phelps, R. K. Plowright, D. M.  
314 Reeder, J. D. Reichard, J. M. Sleeman, D. G. Streicker, J. S. Towner, L. F. Wang,  
315 Possibility for reverse zoonotic transmission of SARS-CoV-2 to free-ranging wildlife: A  
316 case study of bats. *PLoS Pathog* **16**, e1008758 (2020).
- 317 21. J. Z. Shi, Z. Y. Wen, G. X. Zhong, H. L. Yang, C. Wang, B. Y. Huang, R. Q. Liu, X. J.  
318 He, L. Shuai, Z. R. Sun, Y. B. Zhao, P. P. Liu, L. B. Liang, P. F. Cui, J. L. Wang, X. F.  
319 Zhang, Y. T. Guan, W. J. Tan, G. Z. Wu, H. L. Chen, Z. G. Bu, Susceptibility of ferrets,  
320 cats, dogs, and other domesticated animals to SARS-coronavirus 2. *Science* **368**, 1016-  
321 1020 (2020).
- 322 22. W. F. Frick, T. Kingston, J. Flanders, A review of the major threats and challenges to  
323 global bat conservation. *Ann N Y Acad Sci*, <https://doi.org/10.1111/nyas.14045> (2019).
- 324 23. R. C. Edgar, MUSCLE: multiple sequence alignment with high accuracy and high  
325 throughput. *Nucleic Acids Res.* **32**, 1792-1797 (2004).
- 326 24. B. Xu, Z. Yang, PAMLX: a graphical user interface for PAML. *Mol. Biol. Evol.* **30**,  
327 2723-2724 (2013).
- 328 25. E. C. Teeling, M. S. Springer, O. Madsen, P. Bates, S. J. O'Brien, W. J. Murphy, A  
329 molecular phylogeny for bats illuminates biogeography and the fossil record. *Science* **307**,  
330 580-584 (2005).
- 331 26. F. C. Almeida, N. B. Simmons, N. P. Giannini, A species-level phylogeny of Old World  
332 fruit bats with a new higher-level classification of the family Pteropodidae. *Am Mus Novit*,  
333 3950 (2020).
- 334 27. D. Rojas, O. M. Warsi, L. M. Davalos, Bats (Chiroptera: Noctilionoidea) challenge a  
335 recent origin of extant neotropical diversity. *Syst. Biol.* **65**, 432-448 (2016).
- 336 28. S. Fukushi, T. Mizutani, M. Saijo, S. Matsuyama, N. Miyajima, F. Taguchi, S. Itamura, I.  
337 Kurane, S. Morikawa, Vesicular stomatitis virus pseudotyped with severe acute  
338 respiratory syndrome coronavirus spike protein. *J Gen Virol* **86**, 2269-2274 (2005).
- 339 29. C. Schwegmann-Wessels, J. Glende, X. Ren, X. Qu, H. Deng, L. Enjuanes, G. Herrler,  
340 Comparison of vesicular stomatitis virus pseudotyped with the S proteins from a porcine  
341 and a human coronavirus. *J Gen Virol* **90**, 1724-1729 (2009).
- 342 30. M. A. Whitt, Generation of VSV pseudotypes using recombinant DeltaG-VSV for studies  
343 on virus entry, identification of entry inhibitors, and immune responses to vaccines. *J.*  
344 *Virol. Methods* **169**, 365-374 (2010).
- 345 31. J. Yang, R. Yan, A. Roy, D. Xu, J. Poisson, Y. Zhang, The I-TASSER Suite: protein  
346 structure and function prediction. *Nat Methods* **12**, 7-8 (2015).
- 347 32. Y. Zhang, I-TASSER server for protein 3D structure prediction. *BMC Bioinformatics* **9**,  
348 40 (2008).



- 349 33. S. Yuan, H. C. S. Chan, S. Filipek, H. Vogel, PyMOL and Inkscape bridge the data and  
350 the data visualization. *Structure* **24**, 2041-2042 (2016).

351

352

353 **Acknowledgments:** We thank B. Fenton, L. Moretoo, and D.M. Morales-Mart ínez for sharing  
354 their knowledge as to whether certain bats roost or forage in cities, Prof. Zheng-Li Shi for  
355 providing the SARS-CoV-2 virus, and Ming Dai, Zhixiang Huang, Yan Rao, Jing Zhang, and  
356 Bei Wang from ABSL-3 Laboratory of Wuhan University for their technical support. We are  
357 grateful to Beijing Taikang Yicai Foundation for their great support to this work. **Funding:** This  
358 study was supported by Special Fund for COVID-19 Research of Wuhan University, China  
359 NSFC grants (31722051 and 32041007), China National Science and Technology Major Project  
360 (2018ZX10733403). **Author contributions:** H.Z., H.Y., Y.C., and K.L. designed study; H.Z.,  
361 H.Y., H.J. wrote manuscript; H.Y., H.J., Q.L., Z.Z., X.W., and M.G. performed experiments;  
362 H.Y., H.Z., H.J., and Y.C. analyzed data. **Competing interests:** None of the authors have any  
363 competing interests. **Data and materials availability:** All data are available in the manuscript or  
364 the supplementary materials.

365

366

367

368

## Materials and Methods

369

### ACE2 sequence acquisition and selective pressure analysis

370

371

372

373

374

375

376

377

378

We obtained 46 full-length coding sequences of bat *ACE2* in this study, of which 32 were taken from a recent study (8), and 14 were newly extracted from published or recently sequenced genome assemblies (see **Table S1** for the sources and accession numbers for the sequences and assemblies). Next, we aligned the deduced *ACE2* protein sequences using the MUSCLE program (23) (see **Figure S1** for the resulting alignment). The sequence logo was generated with WebLogo (<https://weblogo.berkeley.edu/logo.cgi>). We performed selective pressure analysis on bat *ACE2* using CodeML implemented in PAML (24). Two comparisons of site models (M1a & M2a, M8a & M8) were used to predict positively selected sites (24). The input tree was the species tree (**Figure 1**) taken from previous studies (25-27).

379

380

### Cell culture

381

382

383

384

385

386

387

388

HEK293T cells (293T, ATCC, CRL-3216) and VERO-E6 cells (ATCC, CRL-1586) were cultured in Dulbecco's modified Eagle's medium (DMEM; Gibco) supplemented with 10% fetal bovine serum (FBS), 2.0 mM L-Glutamine, 110 mg/L sodium pyruvate, and 4.5 g/L D-glucose. 11-Hybridoma (CRL-2700) secreting a monoclonal antibody targeting against VSV glycoprotein was cultured in Minimum Essential Medium with Earle's salts and 2.0 mM L-Glutamine (MEM; Gibco). All cells were cultured at 37°C in 5% CO<sub>2</sub> with the regular passage of every 2-3 days. 293T stable cell lines overexpressing *ACE2* orthologs were maintained in growth medium supplemented with 1µg/ml puromycin.

389

## 390 **Plasmids**

391 Human codon-optimized cDNA sequences encoding various ACE2 orthologs and their  
392 mutants fused with a C-terminus 3×Flag tag (DYKDHD-G-DYKDHD-I-DYKDDDDK) were  
393 commercially synthesized and subcloned into a lentiviral transfer vector (pLVX-IRES-puro)  
394 through the EcoRI and NotI restriction sites. The DNA sequences of human codon-optimized  
395 SARS-CoV S protein (CUHK-W1, GenBank: AY278554.2) and SARS-CoV-2 S protein  
396 (Wuhan-Hu-1, GenBank: MN908947) were amplified from plasmids pCMV/hygro-SARS-CoV-  
397 S (VG40150-G-N, Sino Biological, China) and pCAGGS-SARS-CoV-2-S-c9 (gifted from Dr.  
398 Wenhui Li, National Institute of Biological Science, Beijing, China) into pCAGGS vector with  
399 C-terminal 18 aa deletion for improving VSV pseudotyping efficiency (28, 29). The D614G  
400 mutation was introduced into the SARS-CoV-2-S coding sequence to improve *in vitro* infection  
401 efficiency. The plasmids for the expression of coronavirus RBD-IgG Fc fusion proteins were  
402 generated by inserting the coding sequences of SARS-CoV RBD (aa 318-516) and SARS-CoV-2  
403 RBD (aa331-530) into the pCAGGS vector to express fusion proteins with C-terminal human Fc  
404 (IgG1) and N-terminal CD5 secretion leading sequence (MPMGSLQPLATLYLLGMLVASVL).

405

## 406 **Generation of ACE2 stable expression cell lines**

407 293T cells overexpressing ACE2 orthologs were generated by lentiviral transduction.  
408 Specifically, the lentivirus was produced by cotransfection of lentiviral transfer vector carrying  
409 ACE2 coding sequences (pLVX-EF1a-Puro, from Genewiz Inc.) and packaging plasmids  
410 pMD2G (Addgene #12259) and psPAX2 (Addgene #12260) into 293T cells through  
411 Lipofectamine 3000 (Thermo Fisher Scientific, United States). The lentivirus-containing  
412 supernatant was collected and pooled at 24 and 48 hours (hrs) post-transfection. HEK293T cells  
413 were transduced by the lentivirus after 16 hrs, in the presence of 8 µg/ml polybrene. Stable cells  
414 expressing various ACE2 orthologs were selected and maintained in growth medium with  
415 puromycin (1 µg/ml).

416

## 417 **Immunofluorescence assay to evaluate the expression level of ACE2 orthologs**

418 The expression levels of ACE2 orthologs were evaluated by the immunofluorescence assay  
419 detecting the C-terminal 3×Flag tags. The cells for analysis were seeded in the poly-lysine  
420 pretreated 96-well plate at a cell density of  $5 \times 10^5$ /ml (100 µl/well), and cultured for 24 hrs. Cells  
421 were fixed with 4% paraformaldehyde at room temperature for 10 mins, permeabilized with 0.2%  
422 Triton X-100/PBS at room temperature for 10 mins, and blocked with 1% Bovine serum albumin  
423 (BSA) at 37°C for 30 mins. Next they were incubated with the mouse monoclonal antibody  
424 targeting Flag tag (9A3, #8146S, Cell signaling technology, United States) diluted in 1%  
425 BSA/PBS at 37°C for 1 hour. After three rounds of PBS washing, cells were subsequently  
426 incubated with 2 µg/ml of the secondary goat anti-rabbit antibody conjugated with Alexa Fluor  
427 594 (A11032, Thermo Fisher Scientific, United States) diluted in 1% BSA /PBS at room  
428 temperature for 30 mins. The nucleus was stained with Hoechst 33342 (1:5000 dilution in PBS)  
429 in blue. Images were captured with a fluorescence microscope (MI52-N, Mshot, China).

430

## 431 **Production of VSV reporter virus pseudotyped with coronavirus spike proteins**

432 Coronavirus spike protein pseudotyped virus (CoV-psV) were packaged following a  
433 previously described protocol using a replicate-deficient VSV based rhabdoviral pseudotyping  
434 system (VSV-dG) (30). The VSV-G glycoprotein deficient VSV exogenously expressing EGFP  
435 (VSV-dG-GFP) or Firefly Luciferase (VSV-dG-Luc) were rescued by a reverse genetics system  
436 purchased from a company (Kerafast). To produce CoV-psV, Vero-E6 cells were transfected  
437 with the plasmids overexpressing SARS2-CoV (pCAGGS-SARS-S-dc) and SARS2-CoV-2 spike  
438 proteins (pCAGGS-SARS2-S-dc) through Lipofectamine 3000 reagent. After 36 hrs, the  
439 transfected cells were transduced with VSV-dG reporter viruses diluted in serum-free opti-MEM  
440 for 1 hour at 37°C (MOI=10). The transduced cells were washed with culture medium once and  
441 then replenished with fresh culture medium with L1 hybridoma cultured supernatant containing  
442 anti-VSV mAb (1:100 dilution) to neutralize the infectivity of the residual input viruses. The  
443 CoV-psV containing supernatants were harvested at 24 hrs after transduction, clarified at 12,000  
444 rpm for 2 mins at 4°C, and immediately transferred to -80°C for storage. The viral titer (genome  
445 equivalents) was determined by quantitative reverse transcription PCR (RT-qPCR). The RNA  
446 copies in the virus-containing supernatant were detected using the VSV-L gene sequences.

447

#### 448 **Pseudotype entry assay**

449 293T stable cell lines overexpressing various ACE2 orthologs were trypsinized and  
450 resuspended together with SARS-CoV or SARS-CoV-2 pseudotyped viruses (at a genome  
451 equivalents=100) in DMEM with 10% FBS. Next they were seeded at  $5 \times 10^4$  in a well of a 96-  
452 well plate to allow attachment and viral infection simultaneously. At 16-24 hrs after infection,  
453 images of infected cells with GFP expression were acquired with a fluorescence microscope  
454 (MI52-N, Mshot, China). Cells infected with pseudovirus expressing firefly luciferase were  
455 lysed by  $1 \times$  passive lysis buffer (Promega, United States) at room temperature for 15 mins.  
456 Luciferase activity in the cell lysate was determined by a Bright-Glo luciferase assay kit  
457 (Promega, United States) and measured through a Spectra MaxiD3 multi-well Luminometer  
458 (Molecular Devices, United States) or a GloMax® 20/20 Luminometer (Promega, United States).

459

#### 460 **Coronavirus RBD-hFc binding assay**

461 Recombinant SARS-CoV-RBD-hFc and SARS-CoV-2-RBD-hFc proteins were produced  
462 by transient transfection of 293T cells with Lipofectamine 3000. The transfected cells were  
463 cultured in Free-style 293 serum-free medium (Thermo Scientific), and the supernatants  
464 containing the recombinant proteins were collected at 2 and 4 days post-transfection. The RBD-  
465 hFc protein concentration was determined by comparing the target protein band with BSA  
466 standard dilutions through Coomassie staining. The RBD-hFc protein-containing supernatant  
467 was diluted with culture medium (5-10 µg/ml) and then incubated with the 293T stable cell line  
468 overexpressing different ACE2 orthologs for 1 hour at 37°C. Cells were washed twice with  
469 DMEM and then incubated with 2 µg/ml of Alexa Fluor 488 conjugated Goat anti-Human IgG  
470 (A11013, Thermo Fisher Scientific, United States) diluted in DMEM with 2% FBS for 30 mins  
471 at 37°C. For immunostaining, cells were washed twice with PBS and incubated with PBS with  
472 Hoechst 33342 (1:5000 dilution in PBS) for nucleus staining. Images were captured with a  
473 fluorescence microscope (MI52-N, Mshot, China). For flow cytometry analysis, cells were  
474 detached by 5mM EDTA/PBS and analyzed with a CytoFLEX Flow Cytometer  
475 (Beckman Coulter, United States).

476

477

### **SARS-CoV-2 live virus infection assay**

478

479

480

481

482

483

484

485

486

487

488

489

490

491

492

The SARS-CoV-2 (strain IVCAS 6.7512) was provided by the National Virus Resource, Wuhan Institute of Virology, Chinese Academy of Sciences. All SARS-CoV-2 live virus related experiments were approved by the Biosafety Committee Level 3 (ABSL-3) of Wuhan University. All experiments involving SARS-CoV-2 were performed in the BSL-3 facility. SARS-CoV-2 was amplified on Vero-E6 cells and stored at -150°C, and the titer was determined on Vero-E6 cells through a plaque assay. 293T cells expressing ACE2 orthologs were seeded on a poly-lysine coated 96-well plate for 24 hrs before inoculation. Cells were infected with SARS-CoV-2 at MOI=0.01, and then incubated in DMEM with 2% FBS for 48 hrs before testing. The cells were fixed with 4% paraformaldehyde in PBS at room temperature for 1 hour, permeabilized with 0.2% Triton X-100 for 10 mins, and then blocked with 1% BSA/PBS at 37°C for 1 hour. Cells were subsequently incubated with a mouse monoclonal antibody SARS-CoV/SARS-CoV-2 Nucleocapsid Antibody (40143-MM05, Sino Biological, China) at 1:500 at 37°C for 1 hour, and then incubated with 2µg/ml of goat anti-mouse secondary antibody, Alexa Fluor 594 (A-11032, Thermo Fisher Scientific) at 37°C for 1 hour. The nucleus was stained with Hoechst 33342. Images were acquired with a fluorescence microscope (MI52-N, Mshot, China).

493

494

495

### **Homology-based structural modeling**

496

497

498

499

500

501

502

Molecular models of different bat ACE2 were predicted by I-TASSER (Iterative Threading ASSEmbly Refinement) version 5.1 (31). Starting from the amino acid sequences, the I-TASSER algorithm constructed the full-length 3D atomic models by structural template identification, followed by template-based fragment assembly simulations. The model with the highest confidence score in each prediction was used for subsequent analyses (32). Only the predicted structures of the N-terminal peptidase domain (PD) of ACE2 were used in the analyses. The structural alignment and visualization were implemented in PyMOL (33).

503

504

### **Statistical analysis:**

505

506

Data are expressed as mean values with standard deviation. All experiments were repeated 3-5 times, each yielding similar results.

507

508

509

510

511

512

513 **Figure legends:**

514 **Fig. 1. Phylogenetic tree of 46 bat species in this study.** Labels of bat species in our  
515 experiments are indicated. Infection abilities of bat ACE2 to support SARS-CoV and SARS-  
516 CoV-2 entry are shown with different signs: infection data are indicated as % mean values of bat  
517 ACE2 supporting infection compared with the infection supported by human ACE2; infection  
518 efficiency smaller than 5% is indicated with a minus sign (-), between 5% and 50% a plus sign  
519 (+), and greater than 50% a double plus sign (++). Labels shown in bold indicate the bat species  
520 that have been examined by in silico analyses in a recent study (8). Bat phylogeny was taken  
521 from previous studies (25-27).

522  
523 **Fig. 2. Expression of bat ACE2 orthologs and their interaction with SARS-CoV and SARS-  
524 CoV-2 RBD.** (A) Western blot detecting the expression levels of ACE2 orthologs on 293T stable  
525 cells by targeting the C-terminal Flag tag. Glyceraldehyde 3-phosphate dehydrogenase (GAPDH)  
526 was employed as a loading control. (B) Visualization of the intracellular bat ACE2 expression  
527 level by immunofluorescence assay detecting the C-terminal Flag tag. Scale bar=100  $\mu$ m. (C-D)  
528 Assessment of the interaction between different ACE2 orthologs and SARS-CoV-RBD-hFc (C)  
529 or SARS-CoV-2-RBD-hFc (D). Species that do not support efficient binding are underlined.  
530 293T cells stably expressing the different bat ACE2 orthologs were incubated with 5  $\mu$ g/ml of  
531 the recombinant proteins at 37°C for 1 h. The binding efficiency was examined by Alexa Fluor-  
532 488 Goat anti-human IgG through fluorescence assay. Scale bar=200  $\mu$ m.

533  
534 **Fig. 3. Characterization of bat ACE2 orthologs mediating entry of SARS-CoV and SARS-  
535 CoV-2 viruses.** (A-B) The ability of bat ACE2 orthologs to support the entry of SARS-CoV and  
536 SARS-CoV-2 pseudovirus. 293T cells expressing bat ACE2 orthologs in a 96-well plate were  
537 infected with SARS-CoV (A) and SARS-CoV-2 (B) spike protein pseudotyped VSV-dG-Luc.  
538 The luciferase activity of the cell lysate was determined at 20 hours post-infection (hpi). (C)  
539 293T cells expressing bat ACE2 orthologs were inoculated with the SARS-CoV-2 live virus at  
540 MOI=0.01. N proteins (red) in the infected cells were detected by an immunofluorescence assay  
541 at 48 hpi. Scale bar=200  $\mu$ m. Species that show almost no entry for SARS-CoV-2 live virus are  
542 underlined.

543

544 **Fig. 4. Evaluation of the critical binding sites determining the species-specific restriction of  
545 SARS-CoV and SARS-CoV-2 binding and entry.** (A) Swap mutagenesis assay to investigate  
546 the role of critical binding sites on bat ACE2 orthologs for tropism determination. Residues  
547 involved in RBD (according to the structure between SARS2-RBD and human ACE2, PDB:  
548 6M0J) interaction are shown in the table. Residues that changed in the mutagenesis assay are  
549 marked in red. (B) The expression level of the bat ACE2 orthologs and related mutants in  
550 transduced 293T cells was determined by an immunofluorescence assay recognizing the Flag tag.  
551 Scale bar=200  $\mu$ m. (C-D) Binding efficiency of SARS2-RBD-hFc and SARS2-RBD-hFc on  
552 293T cells expressing bat ACE2 and related mutants. Cells were incubated with 5  $\mu$ g/ml of  
553 recombinant proteins at 37 °C for 1 hour, and then washed and incubated with a secondary  
554 antibody recognizing human Fc. Immunostaining (C) and flow cytometry (D) were conducted to  
555 show the binding efficiency. Scale bar=200  $\mu$ m. (E-F) The ability of the indicated ACE2 and  
556 related mutants to support the entry of coronavirus pseudotypes. The 293T cells expressing the

557 indicated ACE2 and their mutants were infected by SARS-CoV and SARS-CoV-2 pseudotypes  
558 expressing GFP (E) and luciferase (F). Infection was analyzed at 20 hpi. Scale bar=200  $\mu\text{m}$ . (G)  
559 293T cells infected by the SARS-CoV-2 live virus at MOI=0.01; the infection was examined at  
560 48 hpi through N protein (red) immunostaining. Nuclei were stained with Hoechst 33342 in blue.  
561 Scale bar=200  $\mu\text{m}$ . (H) Structure alignment for the Bat33 ACE2-PD (cyan) and Bat34 ACE2-PD  
562 (wheat). The regions enclosed by the blue-dashed lines are illustrated in detail in the right, in  
563 which the variation of the interface residues between Bat33 ACE2-PD (cyan) and Bat34 ACE2-  
564 PD (wheat) are indicated by different side chains. (I) Structural alignment for the Bat38 ACE2-  
565 PD (cyan) and Bat40 ACE2-PD (wheat). The regions enclosed by the purple dashed lines are  
566 illustrated in detail in the right, in which the variation of the interface residues between Bat38  
567 ACE2-PD (cyan) and Bat40 ACE2-PD (wheat) are indicated by different side chains.

568

569

# Figure 1

bioRxiv preprint doi: <https://doi.org/10.1101/2020.09.08.284737>; this version posted September 8, 2020. The copyright holder for this preprint (which was not certified by peer review) is the author/funder, who has granted bioRxiv a license to display the preprint in perpetuity. It is made available under aCC-BY-NC-ND 4.0 International license.

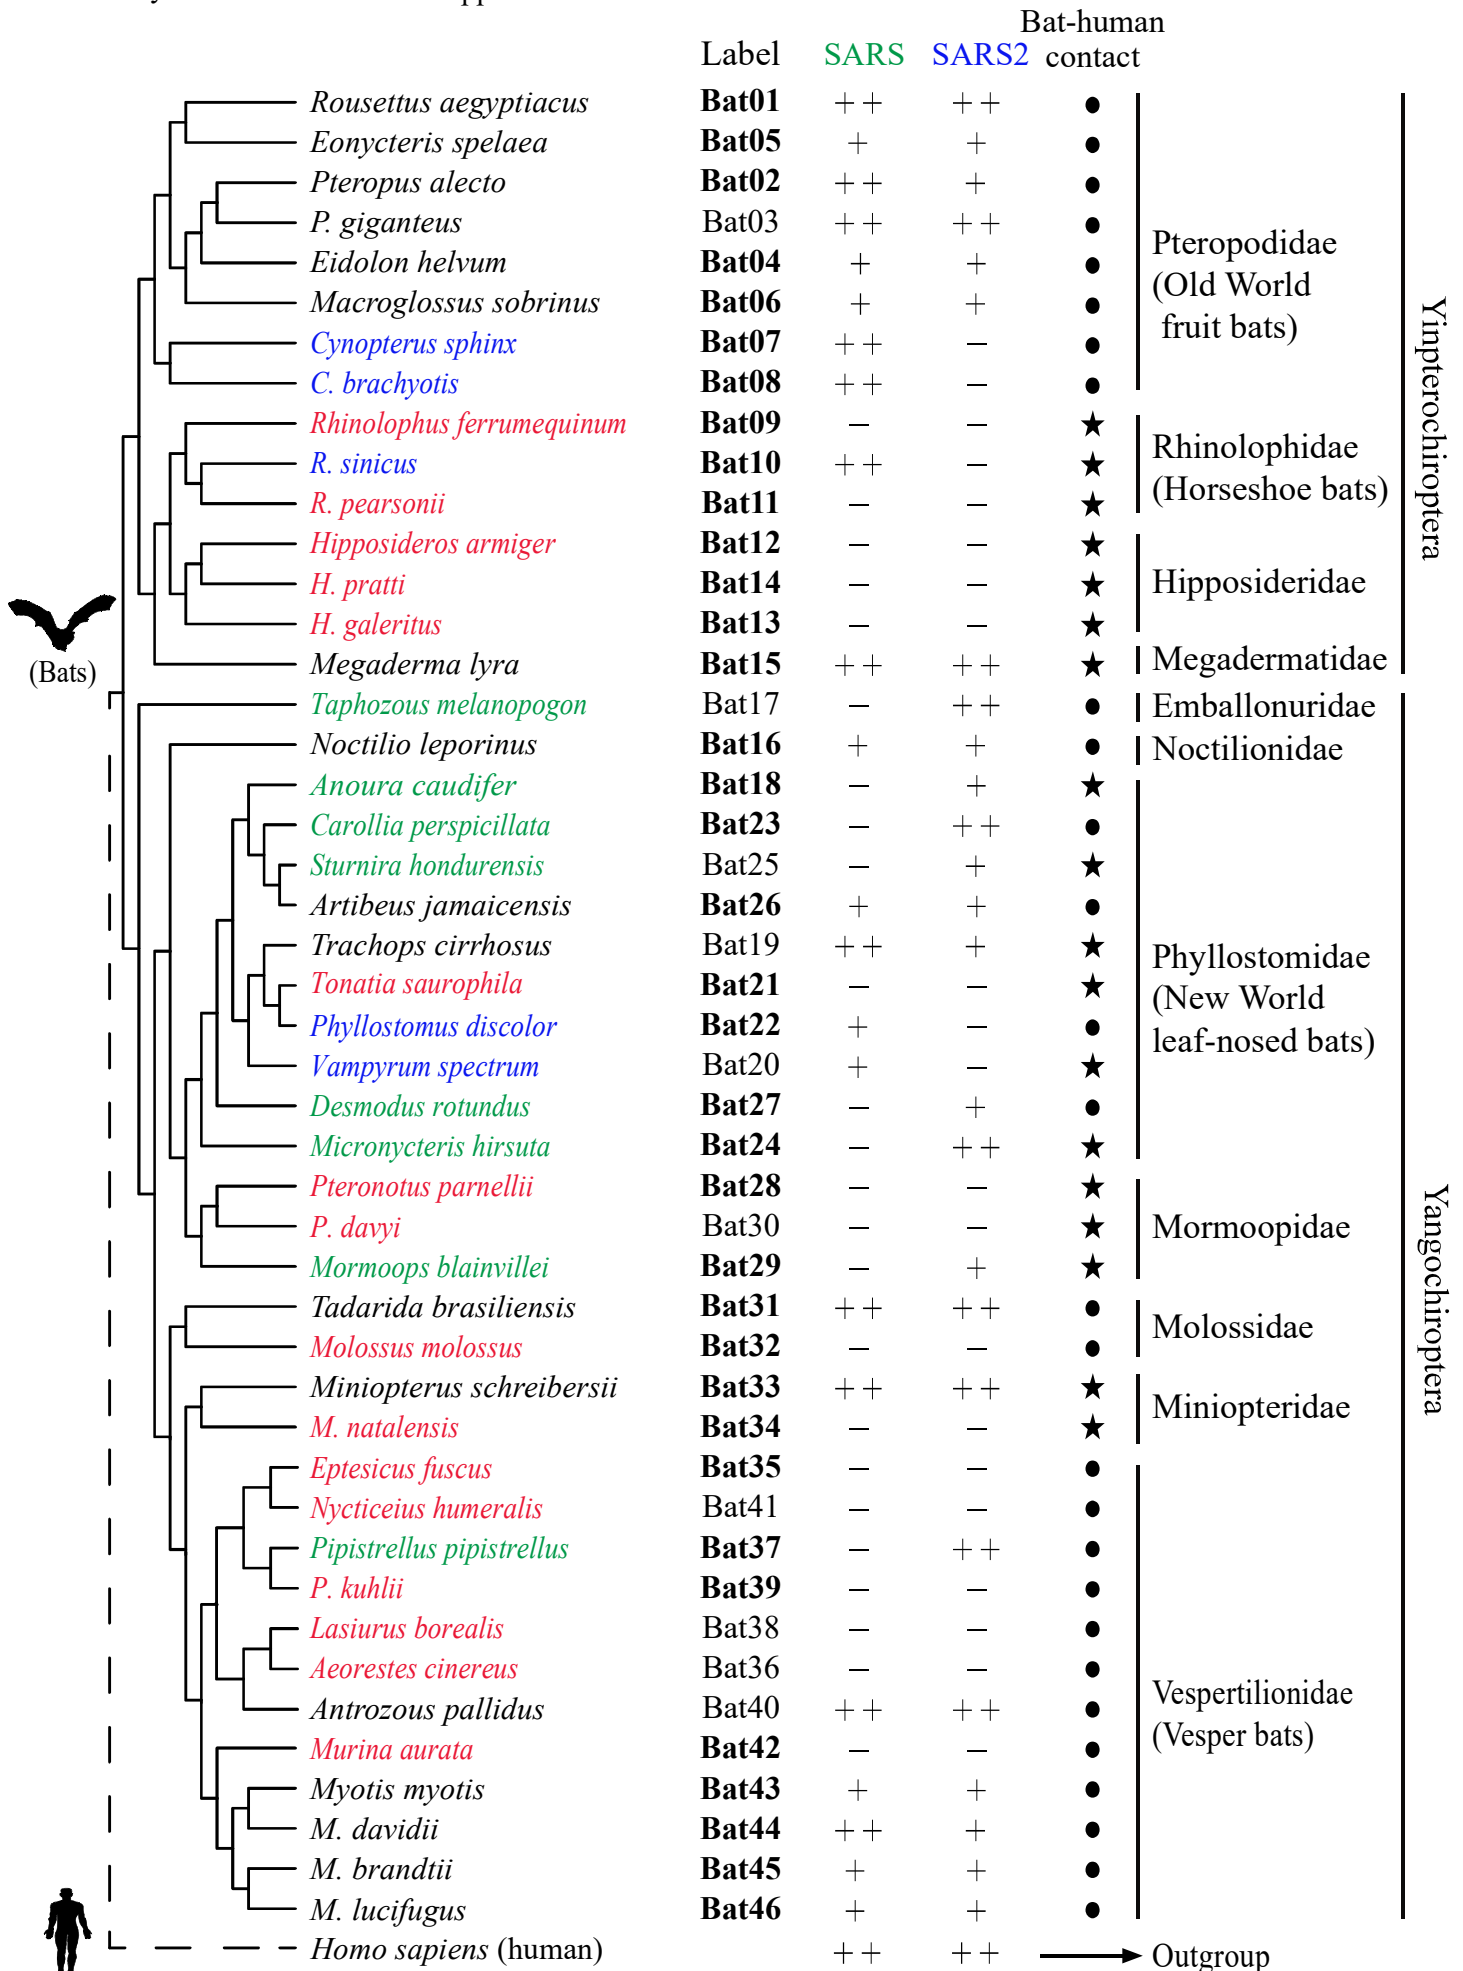

# Figure 2

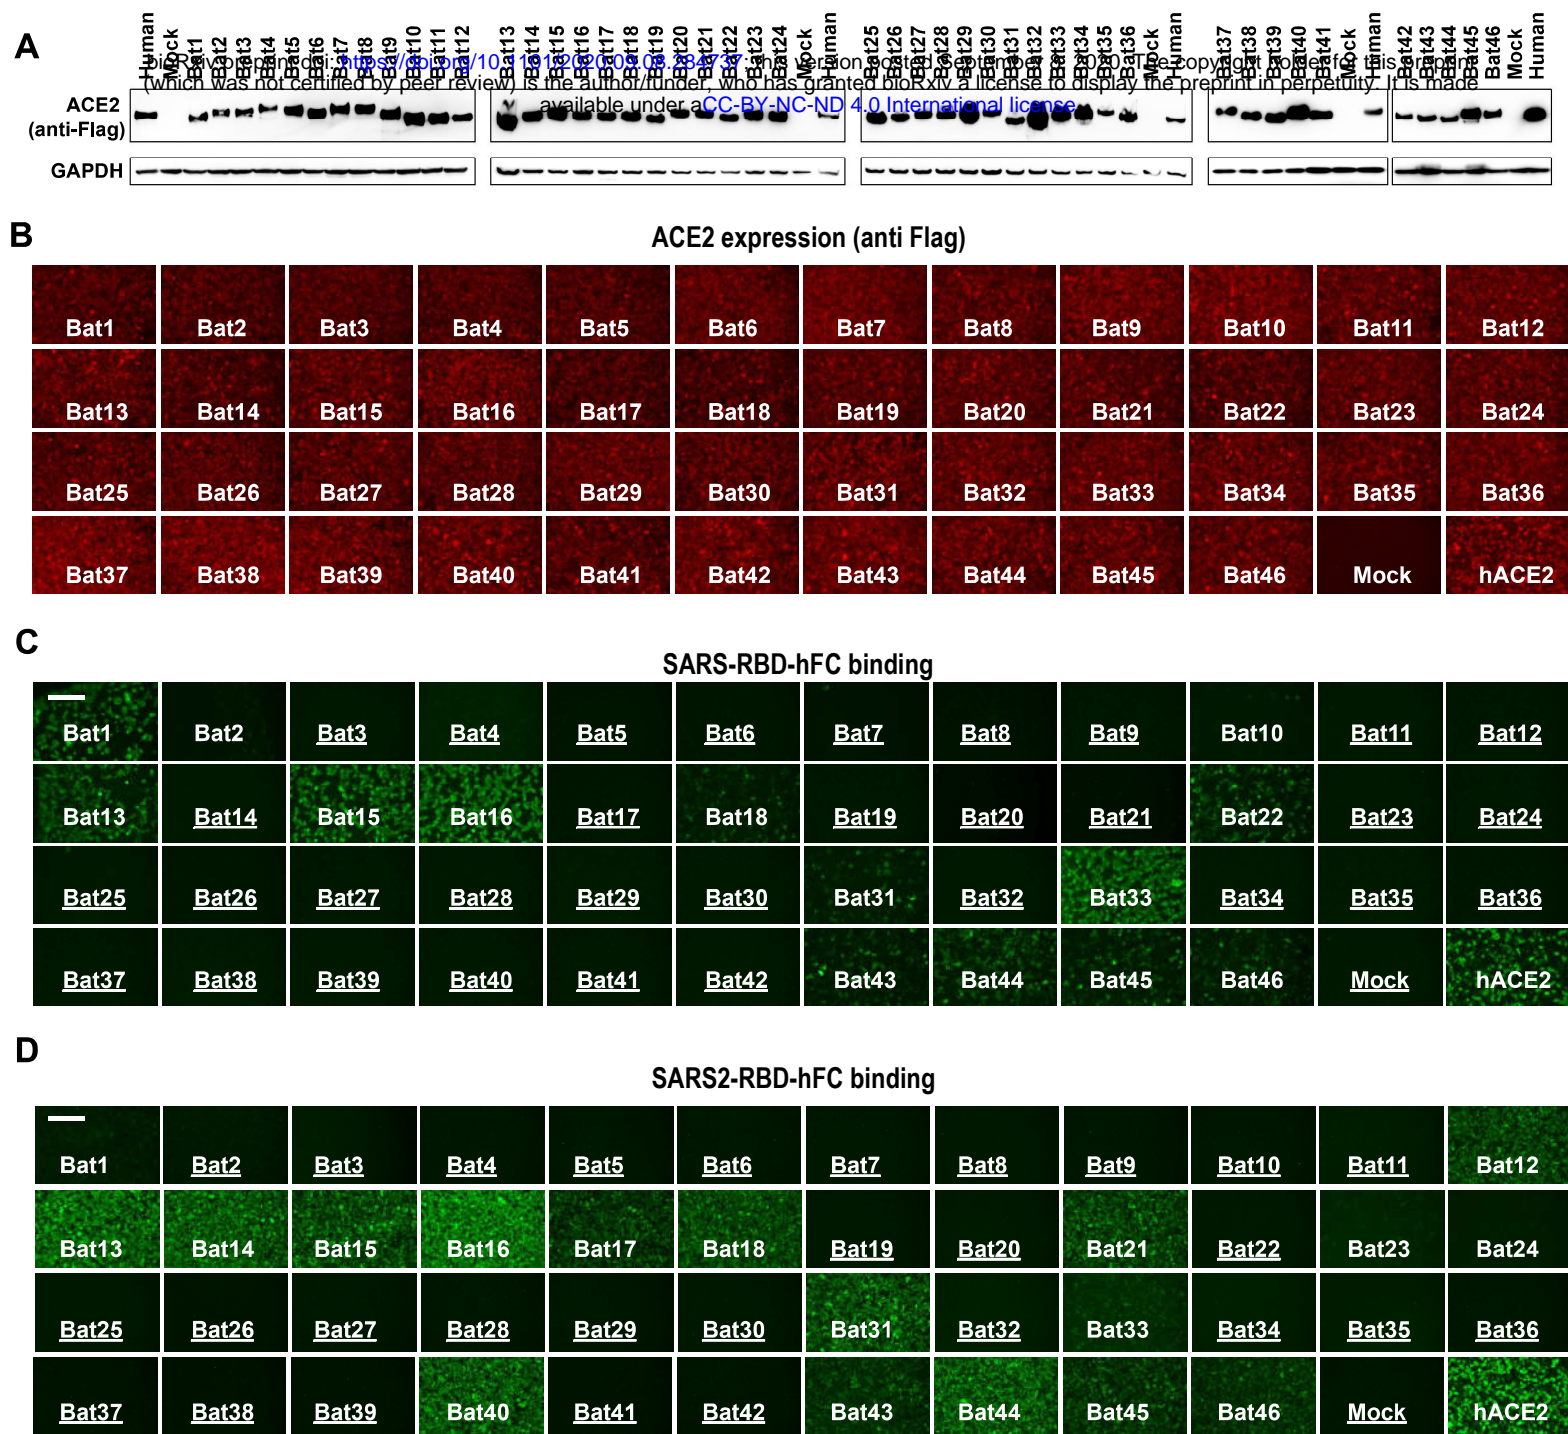



# Figure 3

**A**

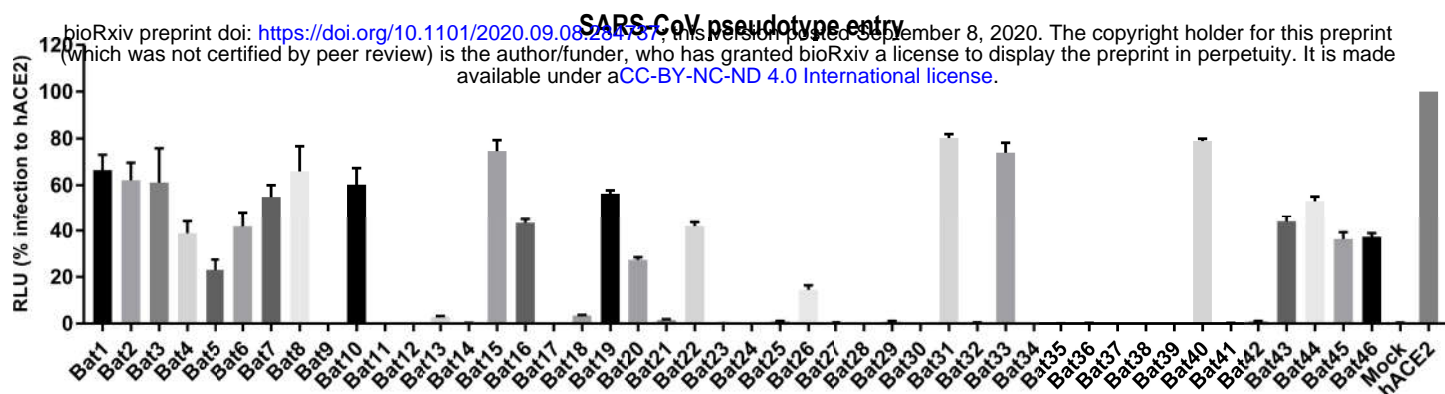

**B**

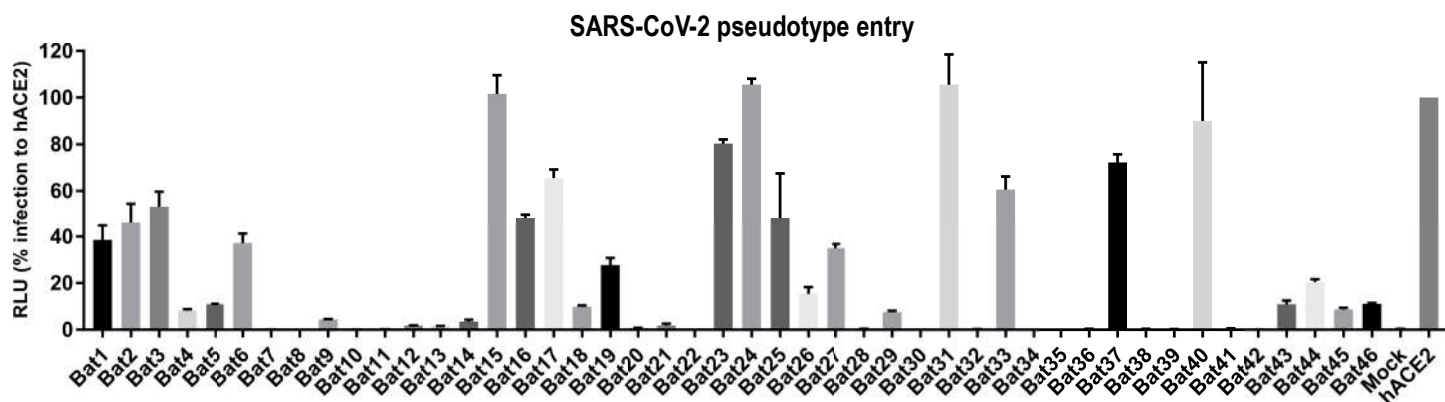

**C**

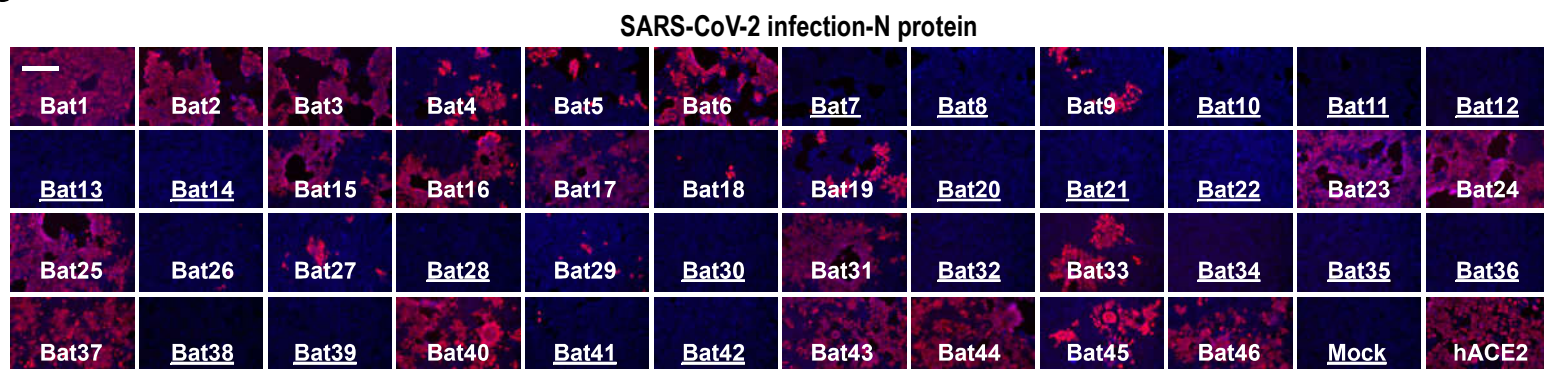

# Figure 4

bioRxiv preprint doi: <https://doi.org/10.1101/2020.09.08.284737>; this version posted September 8, 2020. The copyright holder for this preprint (which was not certified by peer review) is the author/funder, who has granted bioRxiv a license to display the preprint in perpetuity. It is made available under aCC-BY-NC-ND 4.0 International license.

|        | 1 | 2 | 3 | 4 | 5 | 6 | 7 | 8 | 9 | 10 | 11 | 12 | 13 | 14 | 15 | 16 | 17 | 18 | 19 | 20 | 21 | 22 | 23 | 24 | 25 | 26 | 27 | 28 | 29 | 30 | 31 | 32 | 33 | 34 | 35 | 36 | 37 | 38 | 39 | 40 | 41 | 42 | 43 | 44 | 45 | 46 | 47 | 48 | 49 | 50 | 51 | 52 | 53 | 54 | 55 | 56 | 57 | 58 | 59 | 60 | 61 | 62 | 63 | 64 | 65 | 66 | 67 | 68 | 69 | 70 | 71 | 72 | 73 | 74 | 75 | 76 | 77 | 78 | 79 | 80 | 81 | 82 | 83 | 84 | 85 | 86 | 87 | 88 | 89 | 90 | 91 | 92 | 93 | 94 | 95 | 96 | 97 | 98 | 99 | 393 |
|--------|---|---|---|---|---|---|---|---|---|----|----|----|----|----|----|----|----|----|----|----|----|----|----|----|----|----|----|----|----|----|----|----|----|----|----|----|----|----|----|----|----|----|----|----|----|----|----|----|----|----|----|----|----|----|----|----|----|----|----|----|----|----|----|----|----|----|----|----|----|----|----|----|----|----|----|----|----|----|----|----|----|----|----|----|----|----|----|----|----|----|----|----|----|----|----|----|----|----|----|-----|
| Human  | S | Q | T | F | D | K | H | N | S | Q  | E  | D  | H  | E  | L  | N  | L  | T  | Y  | N  | N  | N  | K  | G  | D  | R  | R  | S  | K  | I  | F  | E  | N  | S  | Q  | E  | D  | H  | E  | L  | N  | L  | T  | Y  | N  | N  | N  | K  | G  | D  | R  | R  |    |    |    |    |    |    |    |    |    |    |    |    |    |    |    |    |    |    |    |    |    |    |    |    |    |    |    |    |    |    |    |    |    |    |    |    |    |    |    |    |    |    |    |    |    |    |    |     |
| Bat33  | S | Q | T | F | D | K | H | N | S | Q  | E  | D  | H  | E  | L  | N  | L  | T  | Y  | N  | N  | N  | K  | G  | D  | R  | R  | S  | K  | I  | F  | E  | N  | S  | Q  | E  | D  | H  | E  | L  | N  | L  | T  | Y  | N  | N  | N  | K  | G  | D  | R  | R  |    |    |    |    |    |    |    |    |    |    |    |    |    |    |    |    |    |    |    |    |    |    |    |    |    |    |    |    |    |    |    |    |    |    |    |    |    |    |    |    |    |    |    |    |    |    |    |     |
| Bat33m | S | Q | T | F | D | K | H | N | S | Q  | E  | D  | H  | E  | L  | N  | L  | T  | Y  | N  | N  | N  | K  | G  | D  | R  | R  | S  | K  | I  | F  | E  | N  | S  | Q  | E  | D  | H  | E  | L  | N  | L  | T  | Y  | N  | N  | N  | K  | G  | D  | R  | R  |    |    |    |    |    |    |    |    |    |    |    |    |    |    |    |    |    |    |    |    |    |    |    |    |    |    |    |    |    |    |    |    |    |    |    |    |    |    |    |    |    |    |    |    |    |    |    |     |
| Bat34  | S | Q | T | F | D | K | H | N | S | Q  | E  | D  | H  | E  | L  | N  | L  | T  | Y  | N  | N  | N  | K  | G  | D  | R  | R  | S  | K  | I  | F  | E  | N  | S  | Q  | E  | D  | H  | E  | L  | N  | L  | T  | Y  | N  | N  | N  | K  | G  | D  | R  | R  |    |    |    |    |    |    |    |    |    |    |    |    |    |    |    |    |    |    |    |    |    |    |    |    |    |    |    |    |    |    |    |    |    |    |    |    |    |    |    |    |    |    |    |    |    |    |    |     |
| Bat34m | S | Q | T | F | D | K | H | N | S | Q  | E  | D  | H  | E  | L  | N  | L  | T  | Y  | N  | N  | N  | K  | G  | D  | R  | R  | S  | K  | I  | F  | E  | N  | S  | Q  | E  | D  | H  | E  | L  | N  | L  | T  | Y  | N  | N  | N  | K  | G  | D  | R  | R  |    |    |    |    |    |    |    |    |    |    |    |    |    |    |    |    |    |    |    |    |    |    |    |    |    |    |    |    |    |    |    |    |    |    |    |    |    |    |    |    |    |    |    |    |    |    |    |     |
| Bat38  | S | Q | T | F | D | K | H | N | S | Q  | E  | D  | H  | E  | L  | N  | L  | T  | Y  | N  | N  | N  | K  | G  | D  | R  | R  | S  | K  | I  | F  | E  | N  | S  | Q  | E  | D  | H  | E  | L  | N  | L  | T  | Y  | N  | N  | N  | K  | G  | D  | R  | R  |    |    |    |    |    |    |    |    |    |    |    |    |    |    |    |    |    |    |    |    |    |    |    |    |    |    |    |    |    |    |    |    |    |    |    |    |    |    |    |    |    |    |    |    |    |    |    |     |
| Bat38m | S | Q | T | F | D | K | H | N | S | Q  | E  | D  | H  | E  | L  | N  | L  | T  | Y  | N  | N  | N  | K  | G  | D  | R  | R  | S  | K  | I  | F  | E  | N  | S  | Q  | E  | D  | H  | E  | L  | N  | L  | T  | Y  | N  | N  | N  | K  | G  | D  | R  | R  |    |    |    |    |    |    |    |    |    |    |    |    |    |    |    |    |    |    |    |    |    |    |    |    |    |    |    |    |    |    |    |    |    |    |    |    |    |    |    |    |    |    |    |    |    |    |    |     |
| Bat40  | S | Q | T | F | D | K | H | N | S | Q  | E  | D  | H  | E  | L  | N  | L  | T  | Y  | N  | N  | N  | K  | G  | D  | R  | R  | S  | K  | I  | F  | E  | N  | S  | Q  | E  | D  | H  | E  | L  | N  | L  | T  | Y  | N  | N  | N  | K  | G  | D  | R  | R  |    |    |    |    |    |    |    |    |    |    |    |    |    |    |    |    |    |    |    |    |    |    |    |    |    |    |    |    |    |    |    |    |    |    |    |    |    |    |    |    |    |    |    |    |    |    |    |     |
| Bat40m | S | Q | T | F | D | K | H | N | S | Q  | E  | D  | H  | E  | L  | N  | L  | T  | Y  | N  | N  | N  | K  | G  | D  | R  | R  | S  | K  | I  | F  | E  | N  | S  | Q  | E  | D  | H  | E  | L  | N  | L  | T  | Y  | N  | N  | N  | K  | G  | D  | R  | R  |    |    |    |    |    |    |    |    |    |    |    |    |    |    |    |    |    |    |    |    |    |    |    |    |    |    |    |    |    |    |    |    |    |    |    |    |    |    |    |    |    |    |    |    |    |    |    |     |

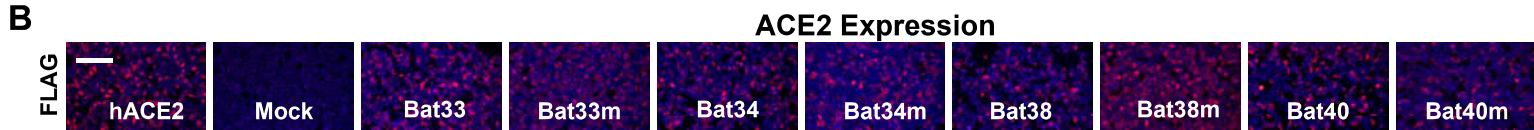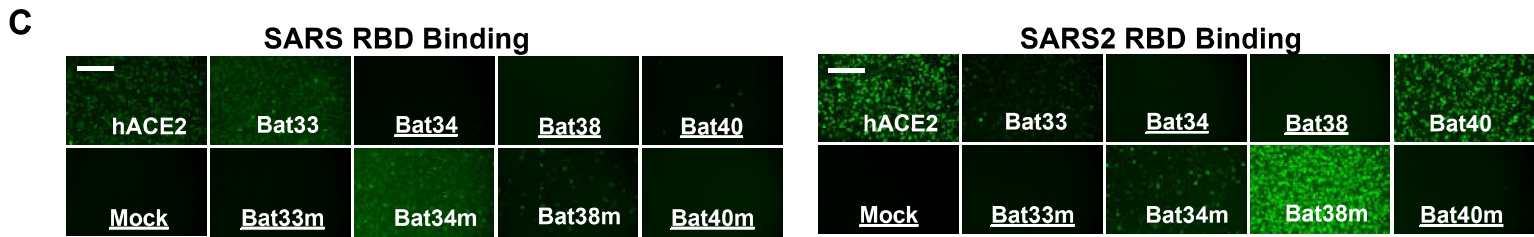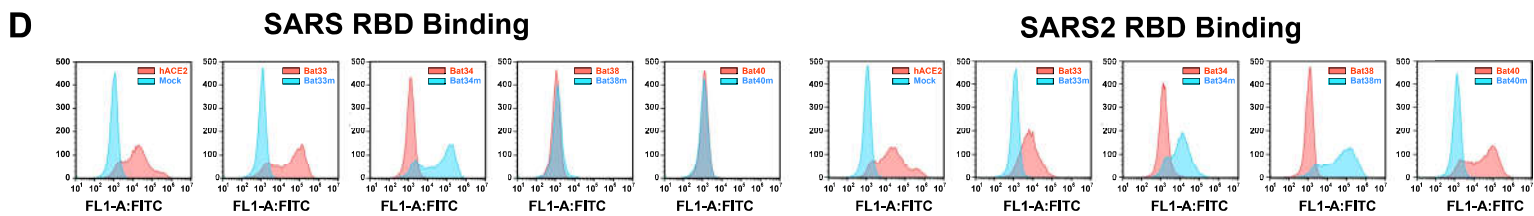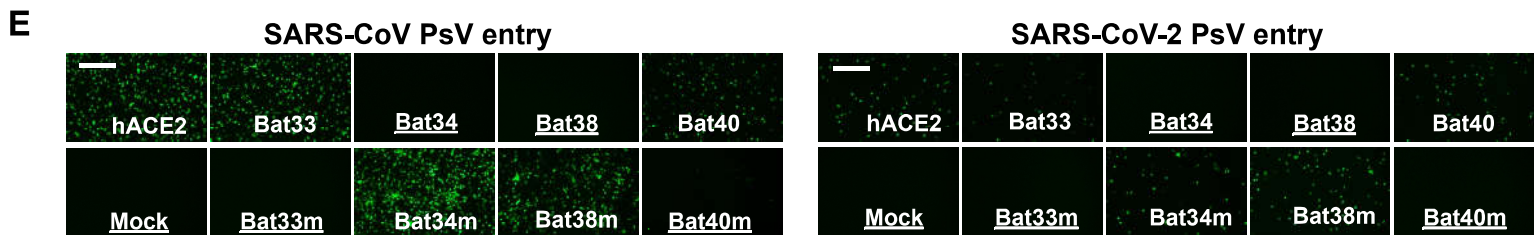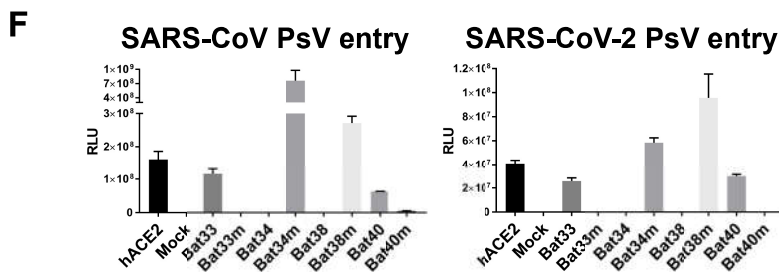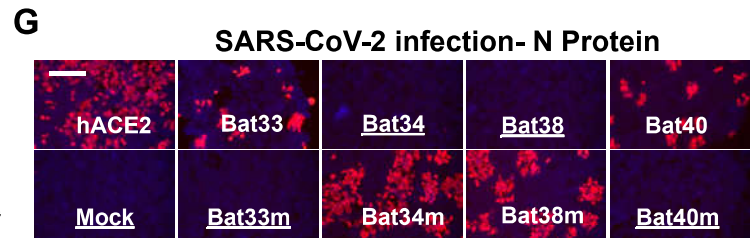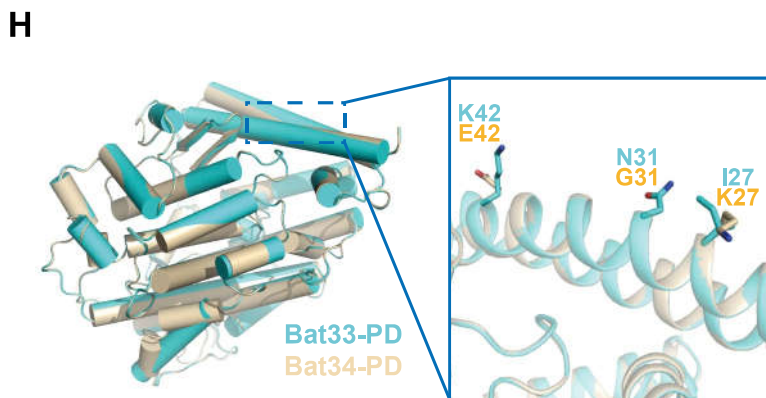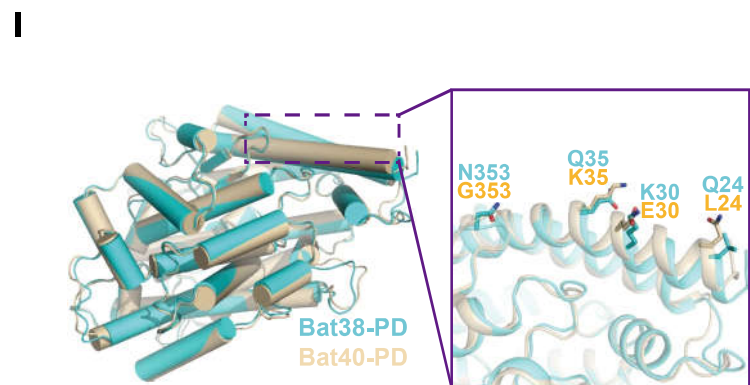

Source: https://www.biorxiv.org/content/10.1101/2020.09.08.284737v1.full.pdf
